# Supplementary material
Source: PubMed Central journal article supplement (PMC6439580)
Supplement: jamadermatol-155-58-s001.pdf [file jamadermatol-155-58-s001.pdf]

## Supplementary Online Content

Tschandl P, Rosendahl C, Akay BN, et al. Expert-level diagnosis of nonpigmented skin cancer by combined convolutional neural networks. *JAMA Dermatol*. Published online November 28, 2018. doi:10.1001/jamadermatol.2018.4378

**eFigure.** Sensitivities (Blue) and Specificities (Orange) at Different Threshold Cutoffs (Green) of the Combined Classifier Evaluated on the Validation Set

**eAppendix.** Neural Network Training

**eTable 1.** Complete List of Diagnoses and Their Frequencies Within the Test-Set

**eTable 2.** Education of Users According to Their Experience Group

**eTable 3.** Percent of Correct Prediction of the Malignancy Status for Specific Diagnoses of a CNN Using Either Close-up or Dermatoscopic Images

This supplementary material has been provided by the authors to give readers additional information about their work.

**eFigure.** Sensitivities (Blue) and Specificities (Orange) at Different Threshold Cutoffs (Green) of the Combined Classifier Evaluated on the Validation Set

A threshold cut at 0.2 (black) is found for a minimum of 51.3% specificity.

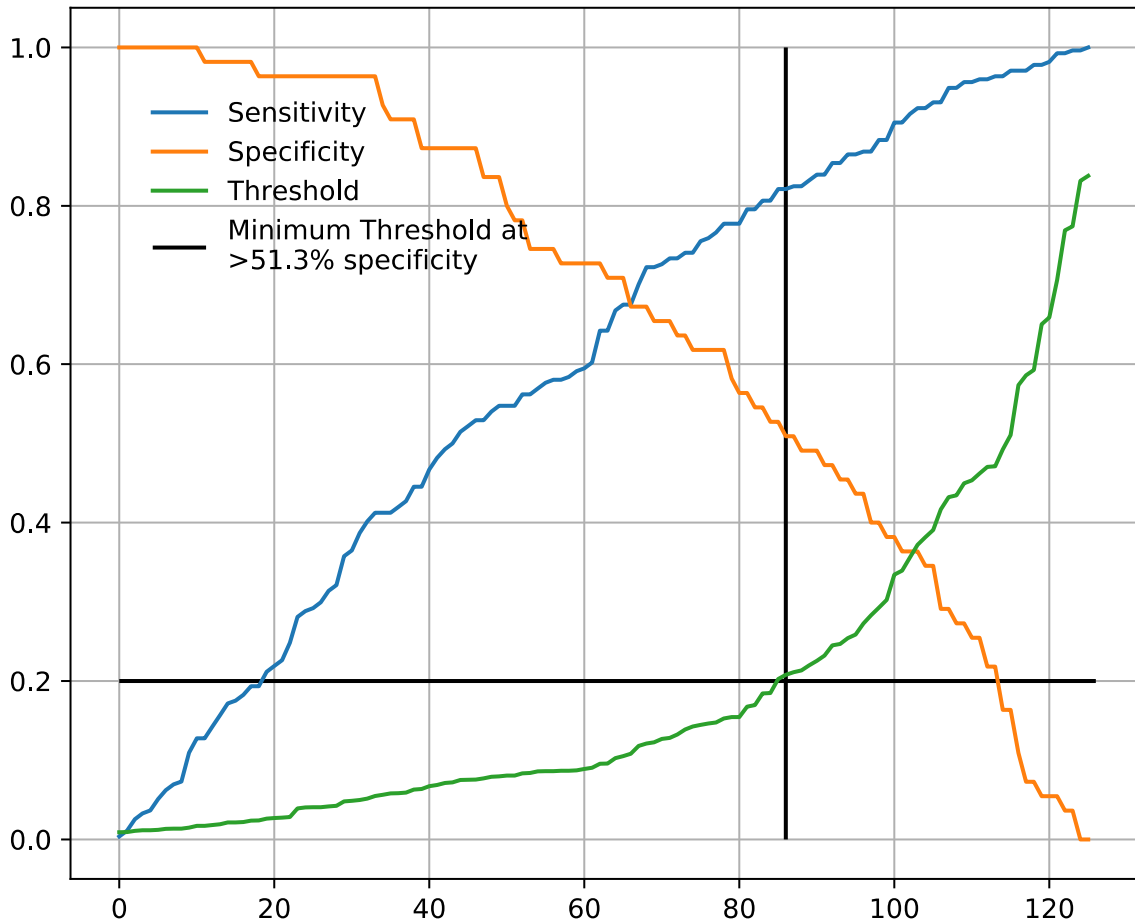

## **eAppendix.** Neural Network Training

We compared multiple architecture and training hyperparameter combinations in a grid-search fashion, and used only the single best performing network for dermoscopic and close-up images, based on validation accuracy, for further analyses. We trained four different CNN architectures (InceptionResNetV2, InceptionV3, Xception, ResNet50) and used model definitions and ImageNet pretrained weights as available in the Tensorflow (version 1.3.0)/ Keras (version 2.0.8) frameworks. We removed the top layer of all networks and sent the flattened output vector through two fully connected ("dense") layers with 10 softmax activated units as an output (8 for the close-up image dataset). We implemented dropout to the first fully connected layer to avoid overfitting. Weights were updated in all layers during training. Training was performed using the Adam optimizer (weight decay 1e-06) and crossentropy loss with logarithmic weighting to adjust for data imbalance. Learning rates were initialized at 1e-05 or 1e-06 and divided by 10 (down to a minimum of 1e-08) if validation loss did not improve for 2 epochs. Training was conducted for a maximum of 50 epochs but stopped early if there was no improvement in validation accuracy for 7 epochs. We used common augmentation techniques on image inputs: Random horizontal and vertical flipping, width- and height shift with empty pixels filled by the value of their nearest neighbor, and random shearing and zooming.

**eTable 1.** Complete List of Diagnoses and Their Frequencies Within the Test-Set

| Abbreviation            | Group     | Included Diagnoses                                                                            | n   |
|-------------------------|-----------|-----------------------------------------------------------------------------------------------|-----|
| akiec                   | Malignant | Actinic Keratosis; Intraepithelial Carcinoma / Bowen disease; In Situ Squamous Cell Carcinoma | 335 |
| bcc                     | Malignant | Basal Cell Carcinoma                                                                          | 720 |
| fibroxanthoma, atypical | Malignant | Atypical Fibroxanthoma                                                                        | 1   |
| kaposi                  | Malignant | Kaposi Sarcoma                                                                                | 1   |
| mcc                     | Malignant | Merkel Cell Carcinoma                                                                         | 1   |
| mel                     | Malignant | Melanoma                                                                                      | 35  |
| melmet                  | Malignant | Melanoma Metastases                                                                           | 9   |
| morbus paget            | Malignant | Morbus Paget                                                                                  | 1   |
| neurofibrosarcoma       | Malignant | Neurofibrosarcoma                                                                             | 1   |
| scc                     | Malignant | Keratoacanthoma; Invasive Squamous Cell Carcinoma                                             | 368 |
| sebaceous carcinoma     | Malignant | Sebaceous carcinoma                                                                           | 1   |
| syringoid carcinoma     | Malignant | Syringoid carcinoma                                                                           | 2   |
| trichilemmal carcinoma  | Malignant | Trichilemmal carcinoma                                                                        | 1   |
| angiofib-fp             | Benign    | Fibrous papule; Angiofibroma                                                                  | 8   |
| angioma                 | Benign    | Angioma; Angiokeratoma                                                                        | 51  |
| bkl                     | Benign    | Inverted Follicular Keratosis; Lichen Planus-like Keratosis; Seborrheic Keratosis             | 241 |
| cca                     | Benign    | Clear Cell Acanthoma                                                                          | 10  |
| chromoblastomycosis     | Benign    | Chromoblastomycosis                                                                           | 1   |
| cnh                     | Benign    | Chondrodermatitis nodularis helicis                                                           | 5   |
| collagenoma             | Benign    | Collagenoma                                                                                   | 1   |
| cyst                    | Benign    | Cyst                                                                                          | 18  |
| dermatitis              | Benign    | Dermatitis                                                                                    | 7   |
| df                      | Benign    | Dermatofibroma                                                                                | 15  |
| eccrine poroma          | Benign    | Eccrine poroma                                                                                | 1   |
| epidermolytic acanthoma | Benign    | Epidermolytic acanthoma                                                                       | 1   |
| fibrokeratoma           | Benign    | Acral fibrokeratoma                                                                           | 1   |
| folliculitis            | Benign    | Folliculitis; Perifolliculitis                                                                | 12  |

|                       |        |                                                                 |    |
|-----------------------|--------|-----------------------------------------------------------------|----|
| granuloma             | Benign | Granuloma                                                       | 6  |
| hidradenoma-s-c       | Benign | Cylindroma; Hidradenoma; Spiradenoma                            | 4  |
| lsc                   | Benign | Lichen sclerosus                                                | 4  |
| mastocytosis          | Benign | Mastocytosis                                                    | 2  |
| molluscum contagiosum | Benign | Molluscum contagiosum                                           | 4  |
| morphea               | Benign | Morphea                                                         | 1  |
| neurofibroma-nl       | Benign | Neurofibroma; Neurilemmoma                                      | 8  |
| nevus                 | Benign | Nevus                                                           | 73 |
| pilomatrixoma         | Benign | Pilomatrixoma                                                   | 3  |
| porokeratosis         | Benign | Porokeratosis                                                   | 6  |
| prurigo nodularis     | Benign | Prurigo nodularis                                               | 3  |
| pseudolymphoma        | Benign | Pseudolymphoma                                                  | 1  |
| psoriasis             | Benign | Psoriasis                                                       | 4  |
| pyogenic granuloma    | Benign | Pyogenic granuloma                                              | 34 |
| scar                  | Benign | Scar                                                            | 24 |
| sebaceous-benign      | Benign | Sebaceous epithelioma; Sebaceous hyperplasia; Sebaceous adenoma | 6  |
| skintag-s-f           | Benign | Skin tag; Fibroma                                               | 8  |
| syringocystadenoma    | Benign | Syringocystadenoma                                              | 1  |
| trichilemmoma         | Benign | Trichilemmoma                                                   | 1  |
| tricho-benign         | Benign | Trichoepithelioma; Trichoblastoma                               | 7  |
| tungiasis             | Benign | Tungiasis                                                       | 1  |
| vascular-malformation | Benign | Vascular malformation; Venous lake                              | 2  |
| viral wart            | Benign | Viral wart                                                      | 18 |
| xanthogranuloma       | Benign | Xanthogranuloma                                                 | 3  |

**eTable 2.** Education of Users According to Their Experience Group

|                               | <b>Beginner (n=31)</b> | <b>Intermediate (n=28)</b> | <b>Expert (n=36)</b> |
|-------------------------------|------------------------|----------------------------|----------------------|
| <b>Dermatology Resident</b>   | 32.3% (n=10)           | 3.6% (n=1)                 | 2.8% (n=1)           |
| <b>Dermatology Specialist</b> | 41.9% (n=13)           | 78.6% (n=22)               | 75.0% (n=27)         |
| <b>General Practitioner</b>   | 22.6% (n=7)            | 14.3% (n=4)                | 14.3% (n=5)          |
| <b>Medical Student</b>        | 3.2% (n=1)             | -                          | -                    |
| <b>Nurse</b>                  | -                      | -                          | 5.6% (n=2)           |
| <b>Oncologist</b>             | -                      | 3.6% (n=1)                 | 2.8% (n=1)           |

**eTable 3.** Percent of Correct Prediction of the Malignancy Status for Specific Diagnoses of a CNN Using Either Close-up or Dermatoscopic Images

| <b>Diagnosis</b> | <b>Close-Up CNN</b>         | <b>Dermatoscopy CNN</b>     |
|------------------|-----------------------------|-----------------------------|
| <b>AKIEC</b>     | 0.587 (95% CI: 0.540-0.633) | 0.779 (95% CI: 0.738-0.817) |
| <b>Angioma</b>   | 0.878 (95% CI: 0.811-0.927) | 0.799 (95% CI: 0.722-0.862) |
| <b>BCC</b>       | 0.572 (95% CI: 0.540-0.603) | 0.906 (95% CI: 0.886-0.924) |
| <b>BKL</b>       | 0.709 (95% CI: 0.679-0.738) | 0.574 (95% CI: 0.542-0.605) |
| <b>DF</b>        | 0.780 (95% CI: 0.624-0.894) | 0.415 (95% CI: 0.263-0.579) |
| <b>Mel</b>       | 0.229 (95% CI: 0.188-0.275) | 0.505 (95% CI: 0.454-0.556) |
| <b>Nevus</b>     | 0.794 (95% CI: 0.731-0.848) | 0.698 (95% CI: 0.630-0.761) |
| <b>SCC</b>       | 0.703 (95% CI: 0.659-0.744) | 0.769 (95% CI: 0.728-0.807) |
